# Supplementary material for: Loss-of-activity-mutation in the cardiac chloride-bicarbonate exchanger AE3 causes short QT syndrome
Source: PubMed Central journal article supplement (PMC5700076; doi:10.1038/s41467-017-01630-0), 2017-11-22
Supplement: 41467_2017_1630_MOESM1_ESM.pdf [file 41467_2017_1630_MOESM1_ESM.pdf]

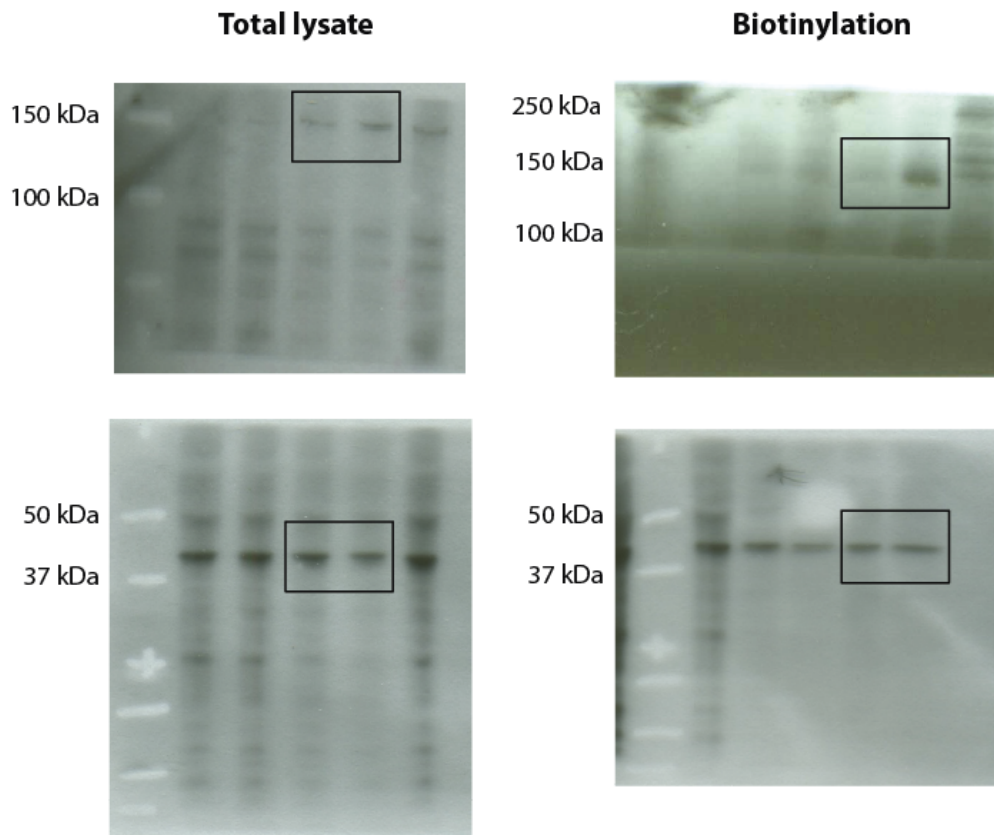

**Supplementary Figure 1. Full-length western blot images.** Uncropped full-length pictures of Western blotting membranes. Boxes indicates cropped blot image in the figure 2a.

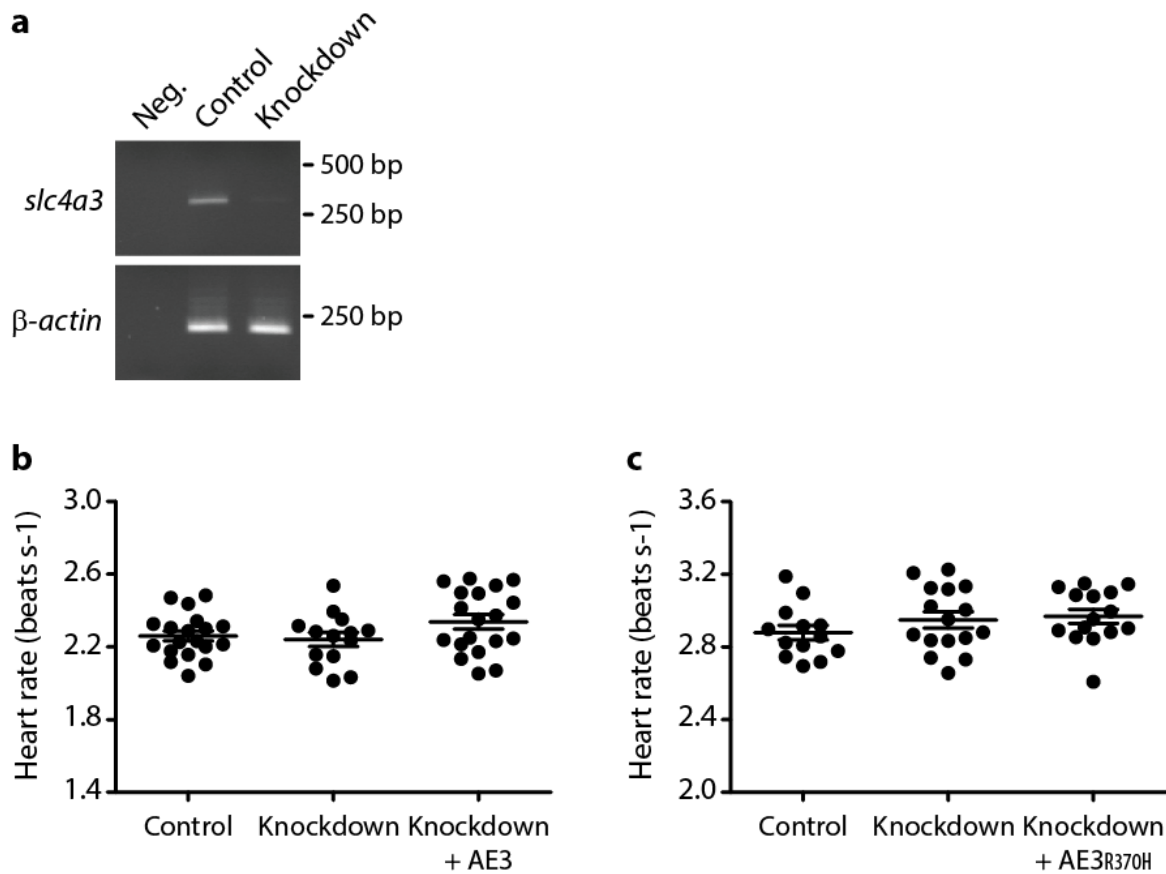

**Supplementary Figure 2. Efficient *slc4a3* knockdown does not affect heart rate.**

**a.** *slc4a3* is efficiently knocked down by microinjection of *slc4a3*-targeted splice-inhibiting morpholino e711 as assessed by RT-PCR. Neg: no-template PCR control, Control: 7 ng standard control morpholino, Knockdown: 7 ng e711.  $\beta$ -actin PCR is used as loading control. Each sample is a pool of 10 embryos. **b,c** Heart rate 2 dpf is not affected by *slc4a3* knockdown, combined *slc4a3* knockdown and AE3 overexpression (b), or combined *slc4a3* knockdown and AE3<sub>R370H</sub> overexpression (c). n=19 (Control), n=14 (Knockdown), and n=19 (Knockdown + AE3) compiled from three independent experiments, each including all three experimental groups (b), and n=13 (Control), n=16 (Knockdown), and n=15 (Knockdown + AE3<sub>R370H</sub>) compiled from three independent experiments, each including all three experimental groups (c). Error bars throughout represent the s.e.m.

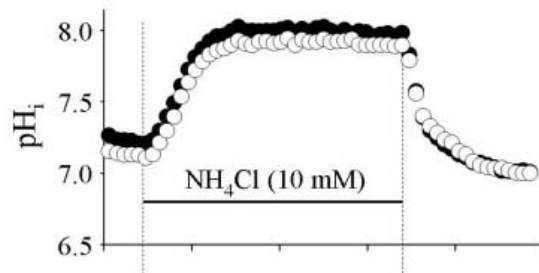

**Supplementary Figure 3. Effect of NH<sub>4</sub>Cl on intracellular pH.** Intracellular pH was monitored in two cardiomyocytes after loading with 4 μM of the pH-sensitive fluorescent dye BCECF via patch pipettes.

**Supplementary Table 1. Clinical features of all family members.**

| Family/<br>relatives | Gender | Clinical presentation / age     | QT<br>(ms) | QTc<br>(ms) | Jp-Tp<br>ms | SLC4A3<br>c.1109 G>A | ICD<br>implantation |
|----------------------|--------|---------------------------------|------------|-------------|-------------|----------------------|---------------------|
| 1 (I:1)              | Male   | Dead / 85 y (father SCD young)  | na         | na          | na          | na                   | na                  |
| 1 (I:2)              | Female | Dead / 75 y                     | na         | na          | na          | na                   | na                  |
| 1 (II:1)             | Male   | Dead / 68 y (bladder cancer)    | na         | na          | na          | na                   | na                  |
| 1 (II:2)             | Female | Dead / 73 y (pulmonary cancer)  | na         | na          | na          | Yes (pm)             | na                  |
| 1 (II:3)             | Male   | Dead / 54 y (cancer)            | na         | na          | na          | na                   | na                  |
| 1 (II:4)             | Female | Dead / 61 y (stroke/aneurism)   | na         | na          | na          | na                   | na                  |
| 1 (II:5)             | Female | Asymptomatic / 74 y             | 320        | 348         | 100         | Yes                  | no                  |
| 1 (II:6)             | Male   | One syncope young / 70 y        | 400        | 425         | 160         | No                   | no                  |
| 1 (II:7)             | Female | Asymptomatic / 69 y             | 410        | 410         | 200         | No                   | no                  |
| 1 (II:8)             | Female | Syncope young / 66 y            | 300        | 355         | 120         | Yes                  | yes                 |
| 1 (II:9)             | Male   | Asymptomatic / 64 y             | 360        | 332         | 140         | Yes                  | yes                 |
| 1 (II:10)            | Female | Syncope young / 63 y            | 300        | 300         | 140         | Yes                  | yes                 |
| 1 (III:1)            | Female | Asymptomatic / 54 y             | 400        | 393         | 220         | No                   | no                  |
| 1 (III:2)            | Female | Asymptomatic / 50 y             | 360        | 392         | 160         | No                   | no                  |
| 1 (III:3)            | Male   | na                              | na         | na          | na          | na                   | na                  |
| 1 (III:4)            | Male   | Dead / 41 y (SCD)               | na         | na          | na          | na                   | na                  |
| 1 (III:5)            | Male   | Dead / 43 y (SCD)               | na         | na          | na          | na                   | na                  |
| 1 (III:6)            | Female | Asymptomatic / 61 y             | 400        | 448         | 200         | No                   | no                  |
| 1 (III:7)            | Male   | Dead / young (traffic accident) | na         | na          | na          | na                   | na                  |
| 1 (III:8)            | Female | Asymptomatic / 56 y             | 280        | 346         | 100         | Yes                  | yes                 |
| 1 (III:9)            | Female | Asymptomatic / 55 y             | 320        | 335         | 140         | Yes                  | yes                 |
| 1 (III:10)           | Female | Asymptomatic / 55 y             | 400        | 465         | 160         | No                   | no                  |
| 1 (III:11)           | Female | Asymptomatic / 53 y             | 360        | 407         | 160         | No                   | no                  |
| 1 (III:12)           | Male   | Asymptomatic / 50 y             | 360        | 360         | 110         | Yes                  | no                  |
| 1 (III:13)           | Male   | Syncope at 27 y / 43 y          | 300        | 337         | 100         | Yes                  | yes                 |
| 1 (III:14)           | Male   | Asymptomatic* LVEF 60% / 56 y   | 300        | 335         | 140         | Yes                  | yes                 |
| 1 (III:15)           | Male   | Asymptomatic / 54 y             | 370        | 380         | 200         | No                   | no                  |
| 1 (III:16)           | Female | Asymptomatic / 45 y             | 380        | 410         | 160         | No                   | no                  |
| 1 (III:17)           | Male   | ACA at 31 y / 39 y              | 320        | 320         | 120         | Yes                  | yes                 |
| 1 (III:18)           | Female | Colitis Ulcerosa / 40 y         | 320        | 345         | 140         | Yes                  | yes                 |
| 1 (III:19)           | Female | Asymptomatic / 40 y             | 380        | 380         | 160         | No                   | no                  |
| 1 (III:20)           | Male   | Asymptomatic / 44 y             | 340        | 400         | 160         | No                   | no                  |
| 1 (III:21)           | Female | Asymptomatic / 43 y             | 360        | 345         | 140         | Yes                  | yes                 |
| 1 (III:22)           | Male   | Asymptomatic / 40 y             | 380        | 380         | 160         | No                   | no                  |
| 1 (IV:1)             | Male   | Severe syncope at 27 y / 36 y   | 320        | 320         | 120         | Yes                  | yes                 |
| 1 (IV:2)             | Female | Asymptomatic / 33               | 420        | 420         | 200         | No                   | no                  |
| 1 (IV:3)             | Male   | Asymptomatic / 39 y             | 320        | 320         | 120         | Yes                  | yes                 |
| 1 (IV:4)             | Female | Asymptomatic / 37 y             | 280        | 323         | 100         | Yes                  | yes                 |
| 1 (IV:5)             | Male   | Asymptomatic / 35 y             | 360        | 386         | 160         | No                   | no                  |
| 1 (IV:6)             | Male   | Asymptomatic / 33 y             | 380        | 390         | 160         | No                   | no                  |

|           |        |                           |     |     |     |     |     |
|-----------|--------|---------------------------|-----|-----|-----|-----|-----|
| 1 (IV:7)  | Female | Asymptomatic / 32 y       | 300 | 333 | 120 | Yes | no  |
| 1 (IV:8)  | Male   | Asymptomatic / 31 y       | 320 | 374 | 140 | No  | no  |
| 1 (IV:9)  | Male   | Asymptomatic / 36 y       | 340 | 390 | 160 | No  | no  |
| 1 (IV:10) | Male   | Asymptomatic / 34 y       | 300 | 320 | 100 | Yes | yes |
| 1 (IV:11) | Female | Asymptomatic / 26 y       | 300 | 355 | 110 | Yes | yes |
| 1 (IV:12) | Male   | Asymptomatic / 32 y       | 340 | 370 | 120 | Yes | no  |
| 1 (IV:13) | Male   | DCM* LVEF 35% / 30 y      | 320 | 367 | 120 | Yes | yes |
| 1 (IV:14) | Male   | Asymptomatic / 30 y       | 390 | 390 | 160 | No  | no  |
| 1 (IV:15) | Male   | Asymptomatic / 19 y       | 340 | 340 | 120 | Yes | no  |
| 1 (IV:16) | Male   | Asymptomatic / 16 y       | 340 | 362 | 140 | Yes | no  |
| 1 (IV:17) | Male   | Dizziness episodes / 20 y | 280 | 346 | 120 | Yes | yes |
| 1 (IV:18) | Female | Asymptomatic / 18 y       | 400 | 400 | 200 | No  | no  |
| 2 (I:1)   | Male   | Dead / 92 y               | na  | na  | na  | na  | na  |
| 2 (I:2)   | Female | Dead / 78 y               | na  | na  | na  | na  | na  |
| 2 (II:1)  | Female | Asymptomatic / 61 y       | 300 | 355 | 140 | Yes | no  |
| 2 (II:2)  | Male   | Asymptomatic / 57 y       | 400 | 400 | 240 | No  | no  |
| 2 (II-3)  | Female | Asymptomatic / 64 y       | 360 | 354 | 140 | Yes | no  |
| 2 (II-4)  | Male   | Asymptomatic / 65 y       | 340 | 354 | 140 | Yes | no  |
| 2 (III-1) | Male   | Dead / 22 y (SCD)         | na  | na  | na  | na  | na  |
| 2 (III-2) | Male   | Asymptomatic / 25 y       | 320 | 345 | 100 | Yes | yes |

ACA = aborted cardiac arrest; DCM = Dilated cardiomyopathy; Jp-Tp = Jpoint-Tpeak interval; LVEF = Left ventricular ejection fraction; na = not available; QTc = Bazett corrected QT interval; SCD = sudden cardiac death; pm = postmortem.

\* Heterozygous for MYH7 (NM\_000257.2):c.5748G>C, p.Gln1916His

**Supplementary Table 2. MOMA NGS Heart panel v1**

| Gene symbol | Gene name                                                            | HGNC ID    | Location      |
|-------------|----------------------------------------------------------------------|------------|---------------|
| ABCC9       | ATP-binding cassette, sub-family C (CFTR/MRP), member 9              | HGNC:60    | 12p12.1       |
| ACTA2       | actin, alpha 2, smooth muscle, aorta                                 | HGNC:130   | 10q23.31      |
| ACTC1       | actin, alpha, cardiac muscle 1                                       | HGNC:143   | 15q14         |
| ACTN2       | actinin, alpha 2                                                     | HGNC:164   | 1q42-q43      |
| AKAP9       | A kinase (PRKA) anchor protein (yotiao) 9                            | HGNC:379   | 7q21-q22      |
| ANK2        | ankyrin 2, neuronal                                                  | HGNC:493   | 4q25-q26      |
| APOB        | apolipoprotein B                                                     | HGNC:603   | 2p24-p23      |
| CACNA1C     | calcium channel, voltage-dependent, L type, alpha 1C subunit         | HGNC:1390  | 12p13.3       |
| CACNA1G     | calcium channel, voltage-dependent, T type, alpha 1G subunit         | HGNC:1394  | 17q22         |
| CACNB2      | calcium channel, voltage-dependent, beta 2 subunit                   | HGNC:1402  | 10p12         |
| CALM1       | calmodulin 1 (phosphorylase kinase, delta)                           | HGNC:1442  | 14q32.11      |
| CALR3       | calreticulin 3                                                       | HGNC:20407 | 19p13.11      |
| CASQ2       | calsequestrin 2 (cardiac muscle)                                     | HGNC:1513  | 1p13.1        |
| CAV3        | caveolin 3                                                           | HGNC:1529  | 3p25          |
| CBS         | cystathionine-beta-synthase                                          | HGNC:1550  | 21q22.3       |
| CSRP3       | cysteine and glycine-rich protein 3 (cardiac LIM protein)            | HGNC:2472  | 11p15.1       |
| CTF1        | cardiotrophin 1                                                      | HGNC:2499  | 16p11.2       |
| DES         | desmin                                                               | HGNC:2770  | 2q35          |
| DSC2        | desmocollin 2                                                        | HGNC:3036  | 18q12.1       |
| DSG2        | desmoglein 2                                                         | HGNC:3049  | 18q12.1       |
| DSP         | desmoplakin                                                          | HGNC:3052  | 6pter-p21     |
| DTNA        | dystrobrevin, alpha                                                  | HGNC:3057  | 18q12         |
| EYA4        | eyes absent homolog 4 (Drosophila)                                   | HGNC:3522  | 6q23          |
| FBN1        | fibrillin 1                                                          | HGNC:3603  | 15q21.1       |
| FKTN        | fukutin                                                              | HGNC:3622  | 9q31-q33      |
| GJA5        | gap junction protein, alpha 5, 40kDa                                 | HGNC:4279  | 1q21.1        |
| GLA         | galactosidase, alpha                                                 | HGNC:4296  | Xq21.3-q22    |
| GPD1L       | glycerol-3-phosphate dehydrogenase 1-like                            | HGNC:28956 | 3p22.3        |
| JPH2        | junctionophilin 2                                                    | HGNC:14202 | 20q12-q13.11  |
| JUP         | junction plakoglobin                                                 | HGNC:6207  | 17q21         |
| KCNA5       | potassium voltage-gated channel, shaker-related subfamily, member 5  | HGNC:6224  | 12p13         |
| KCNE1       | potassium voltage-gated channel, Isk-related family, member 1        | HGNC:6240  | 21q22.1-q22.2 |
| KCNE2       | potassium voltage-gated channel, Isk-related family, member 2        | HGNC:6242  | 21q22.1       |
| KCNH2       | potassium voltage-gated channel, subfamily H (eag-related), member 2 | HGNC:6251  | 7q36.1        |
| KCNJ2       | potassium inwardly-rectifying channel, subfamily J, member 2         | HGNC:6263  | 17q24.3       |
| KCNQ1       | potassium voltage-gated channel, KQT-like subfamily, member 1        | HGNC:6294  | 11p15.5       |
| KCNQ4       | potassium voltage-gated channel, KQT-like subfamily, member 4        | HGNC:6298  | 1p34          |

|         |                                                                                             |            |               |
|---------|---------------------------------------------------------------------------------------------|------------|---------------|
| LAMP2   | lysosomal-associated membrane protein 2                                                     | HGNC:6501  | Xq24-q25      |
| LDB3    | LIM domain binding 3                                                                        | HGNC:15710 | 10q22.3-q23.2 |
| LDLR    | low density lipoprotein receptor                                                            | HGNC:6547  | 19p13.2       |
| LMNA    | lamin A/C                                                                                   | HGNC:6636  | 1q22          |
| MTHFR   | methylenetetrahydrofolate reductase (NAD(P)H)                                               | HGNC:7436  | 1p36.3        |
| MYBPC3  | myosin binding protein C, cardiac                                                           | HGNC:7551  | 11p11.2       |
| MYH6    | myosin, heavy chain 6, cardiac muscle, alpha                                                | HGNC:7576  | 14q11.2-q13   |
| MYH7    | myosin, heavy chain 7, cardiac muscle, beta                                                 | HGNC:7577  | 14q11.2-q13   |
| MYL2    | myosin, light chain 2, regulatory, cardiac, slow                                            | HGNC:7583  | 12q24.11      |
| MYL3    | myosin, light chain 3, alkali; ventricular, skeletal, slow                                  | HGNC:7584  | 3p            |
| MYOZ2   | myozenin 2                                                                                  | HGNC:1330  | 4q26-q27      |
| NEXN    | nexilin (F actin binding protein)                                                           | HGNC:29557 | 1p31.1        |
| NPPA    | natriuretic peptide A                                                                       | HGNC:7939  | 1p36.21       |
| PCSK9   | proprotein convertase subtilisin/kexin type 9                                               | HGNC:20001 | 1p34.1-p32    |
| PKP2    | plakophilin 2                                                                               | HGNC:9024  | 12p11         |
| PLN     | phospholamban                                                                               | HGNC:9080  | 6q22.1        |
| PRKAG2  | protein kinase, AMP-activated, gamma 2 non-catalytic subunit                                | HGNC:9386  | 7q35-q36      |
| RBM20   | RNA binding motif protein 20                                                                | HGNC:27424 | 10q25.3       |
| RYR2    | ryanodine receptor 2 (cardiac)                                                              | HGNC:10484 | 1q43          |
| SCN1B   | sodium channel, voltage-gated, type I, beta subunit                                         | HGNC:10586 | 19            |
| SCN4B   | sodium channel, voltage-gated, type IV, beta subunit                                        | HGNC:10592 | 11q23.3       |
| SCN5A   | sodium channel, voltage-gated, type V, alpha subunit                                        | HGNC:10593 | 3p21          |
| SGCD    | sarcoglycan, delta (35kDa dystrophin-associated glycoprotein)                               | HGNC:10807 | 5q33-q34      |
| SLC25A4 | solute carrier family 25 (mitochondrial carrier; adenine nucleotide translocator), member 4 | HGNC:10990 | 4q35          |
| SNTA1   | syntrophin, alpha 1                                                                         | HGNC:11167 | 20q11.2       |
| TAZ     | tafazzin                                                                                    | HGNC:11577 | Xq28          |
| TCAP    | titin-cap                                                                                   | HGNC:11610 | 17q12         |
| TGFB3   | transforming growth factor, beta 3                                                          | HGNC:11769 | 14q24         |
| TGFBR2  | transforming growth factor, beta receptor II (70/80kDa)                                     | HGNC:11773 | 3p22          |
| TMEM43  | transmembrane protein 43                                                                    | HGNC:28472 | 3p25.1        |
| TMPO    | thymopoietin                                                                                | HGNC:11875 | 12q22         |
| TNNC1   | troponin C type 1 (slow)                                                                    | HGNC:11943 | 3p21.1        |
| TNNI3   | troponin I type 3 (cardiac)                                                                 | HGNC:11947 | 19q13.4       |
| TNNT2   | troponin T type 2 (cardiac)                                                                 | HGNC:11949 | 1q32          |
| TPM1    | tropomyosin 1 (alpha)                                                                       | HGNC:12010 | 15q22.1       |
| TTN     | titin                                                                                       | HGNC:12403 | 2q31          |
| TTR     | transthyretin                                                                               | HGNC:12405 | 18q12.1       |
| VCL     | vinculin                                                                                    | HGNC:12665 | 10q22.1-q23   |

**Supplementary Table 3. Exome sequencing statistics**

| Family/<br>relatives | Exome<br>coverage | SLC4A3<br>c.1109 | Position<br>coverage | Frequency<br>SLC4A3<br>c.1109A | Forward<br>reads<br>SLC4A3<br>c.1109A | Reverse<br>reads<br>SLC4A3<br>c.1109A | Average<br>quality<br>SLC4A3<br>c.1109A |
|----------------------|-------------------|------------------|----------------------|--------------------------------|---------------------------------------|---------------------------------------|-----------------------------------------|
| 1 (II:6)             | 117.3             | Wild type        | 179                  | Wild type                      | Wild type                             | Wild type                             | Wild type                               |
| 1 (III:6)            | 102.1             | Wild type        | 139                  | Wild type                      | Wild type                             | Wild type                             | Wild type                               |
| 1 (III:16)           | 116.2             | Wild type        | 196                  | Wild type                      | Wild type                             | Wild type                             | Wild type                               |
| 1 (III:17)           | 105.8             | Heterozygous     | 162                  | 77/162 (47.53%)                | 24                                    | 53                                    | 33.16                                   |
| 1 (IV:1)             | 81.3              | Heterozygous     | 111                  | 46/111 (41.44%)                | 19                                    | 28                                    | 33.61                                   |
| 1 (IV:2)             | 88.8              | Wild type        | 86                   | Wild type                      | Wild type                             | Wild type                             | Wild type                               |
| 1 (IV:3)             | 121.1             | Heterozygous     | 237                  | 126/237 (53.16%)               | 35                                    | 91                                    | 33.1                                    |
| 1 (IV:4)             | 133.6             | Heterozygous     | 220                  | 111/120 (50.45%)               | 33                                    | 78                                    | 32.76                                   |
| 2 (I:1)              | 52.5              | Heterozygous     | 40                   | 15/40 (37.50%)                 | 4                                     | 11                                    | 37.53                                   |
| 2 (I:2)              | 68.5              | Wild type        | 86                   | Wild type                      | Wild type                             | Wild type                             | Wild type                               |
| 2 (II:2)             | 86.4              | Heterozygous     | 71                   | 38/71 (53.52 %)                | 9                                     | 29                                    | 33.74                                   |
